# Supplementary material for: OPUS-DSD: Deep Structural Disentanglement for cryo-EM Single Particle Analysis
Source: bioRxiv or medRxiv preprint supplement (doi:10.1101/2022.11.22.517601), 2022-11-24

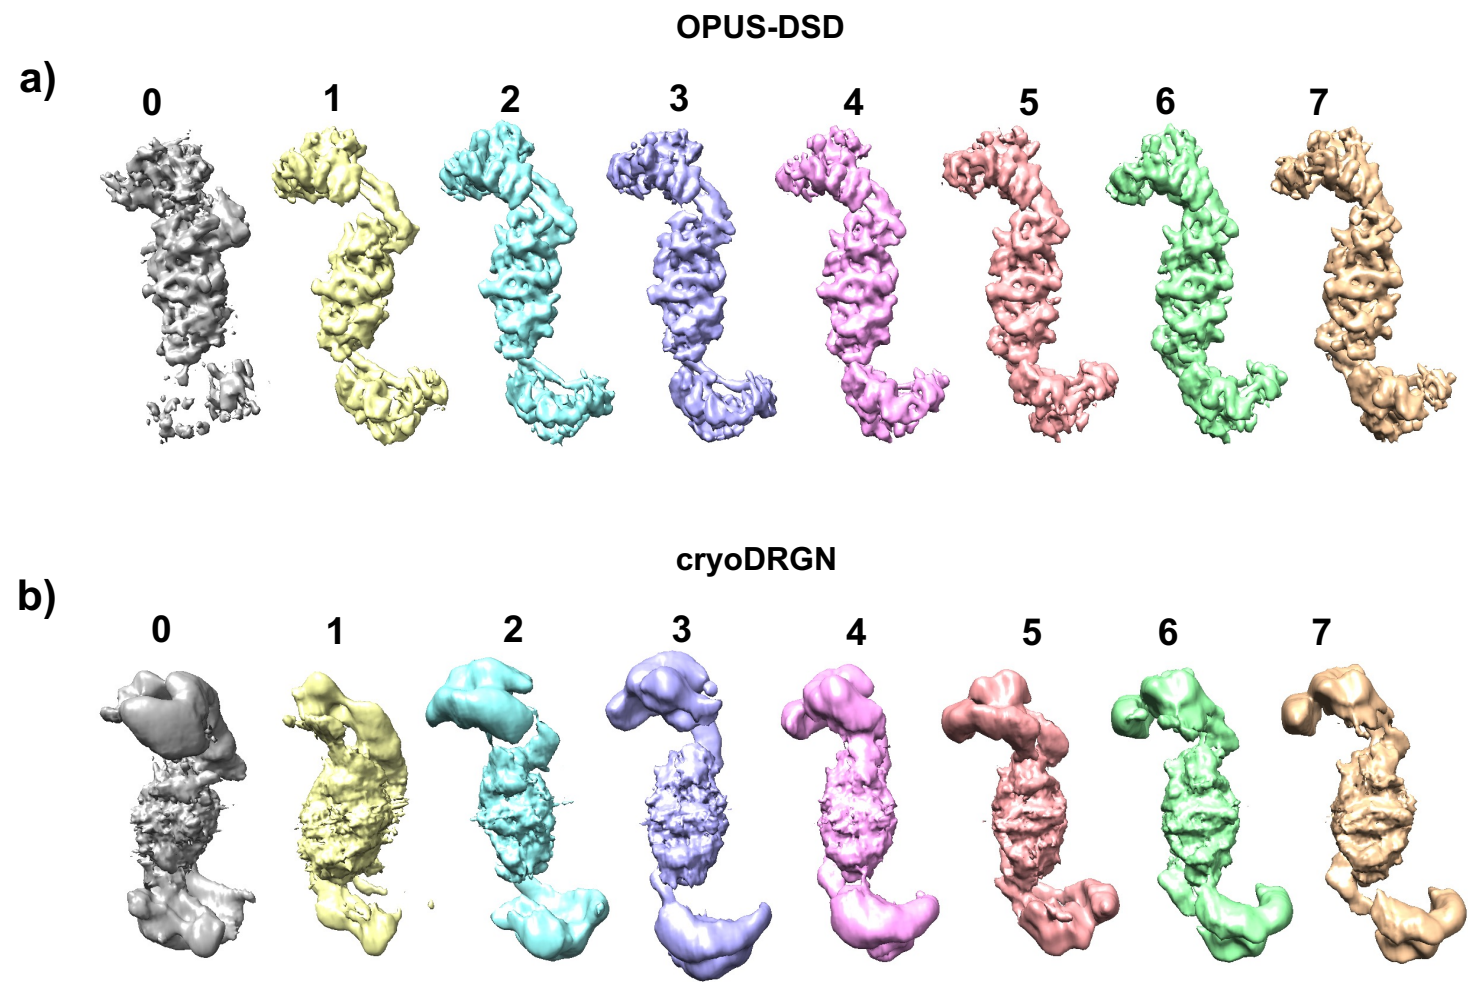

**Fig.S1**

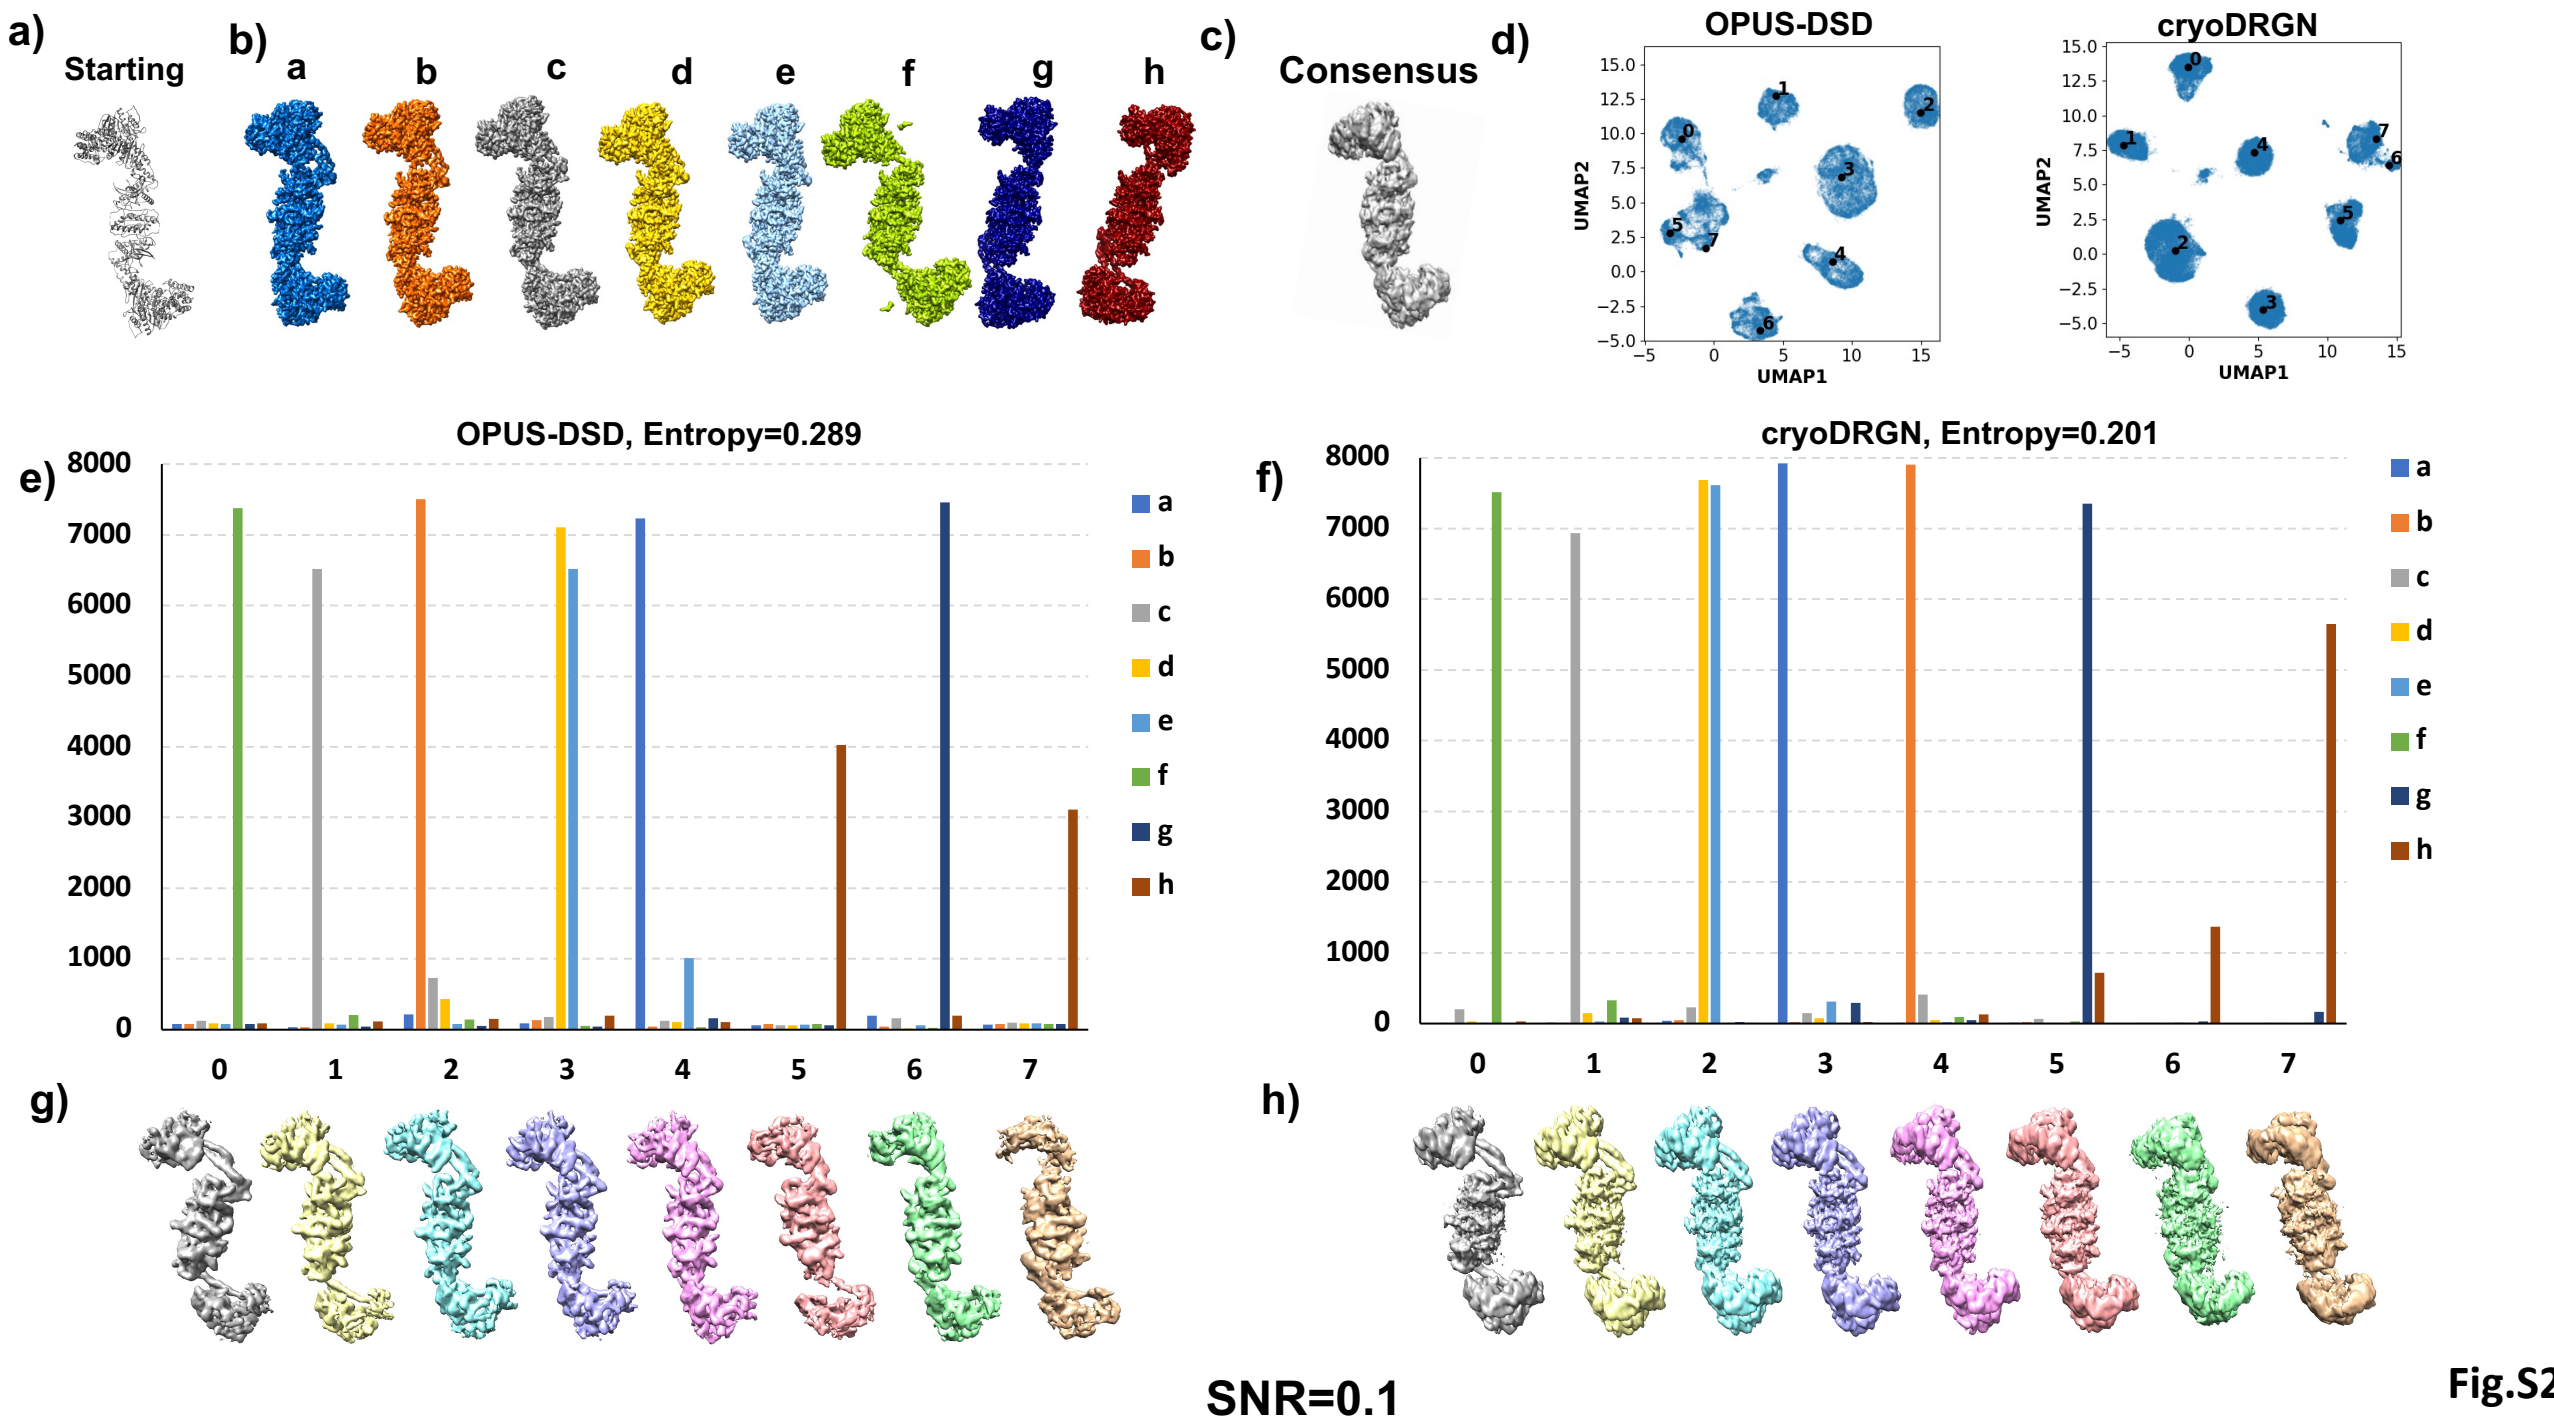

Refinements after randomly discarding quarter of original 84k particles

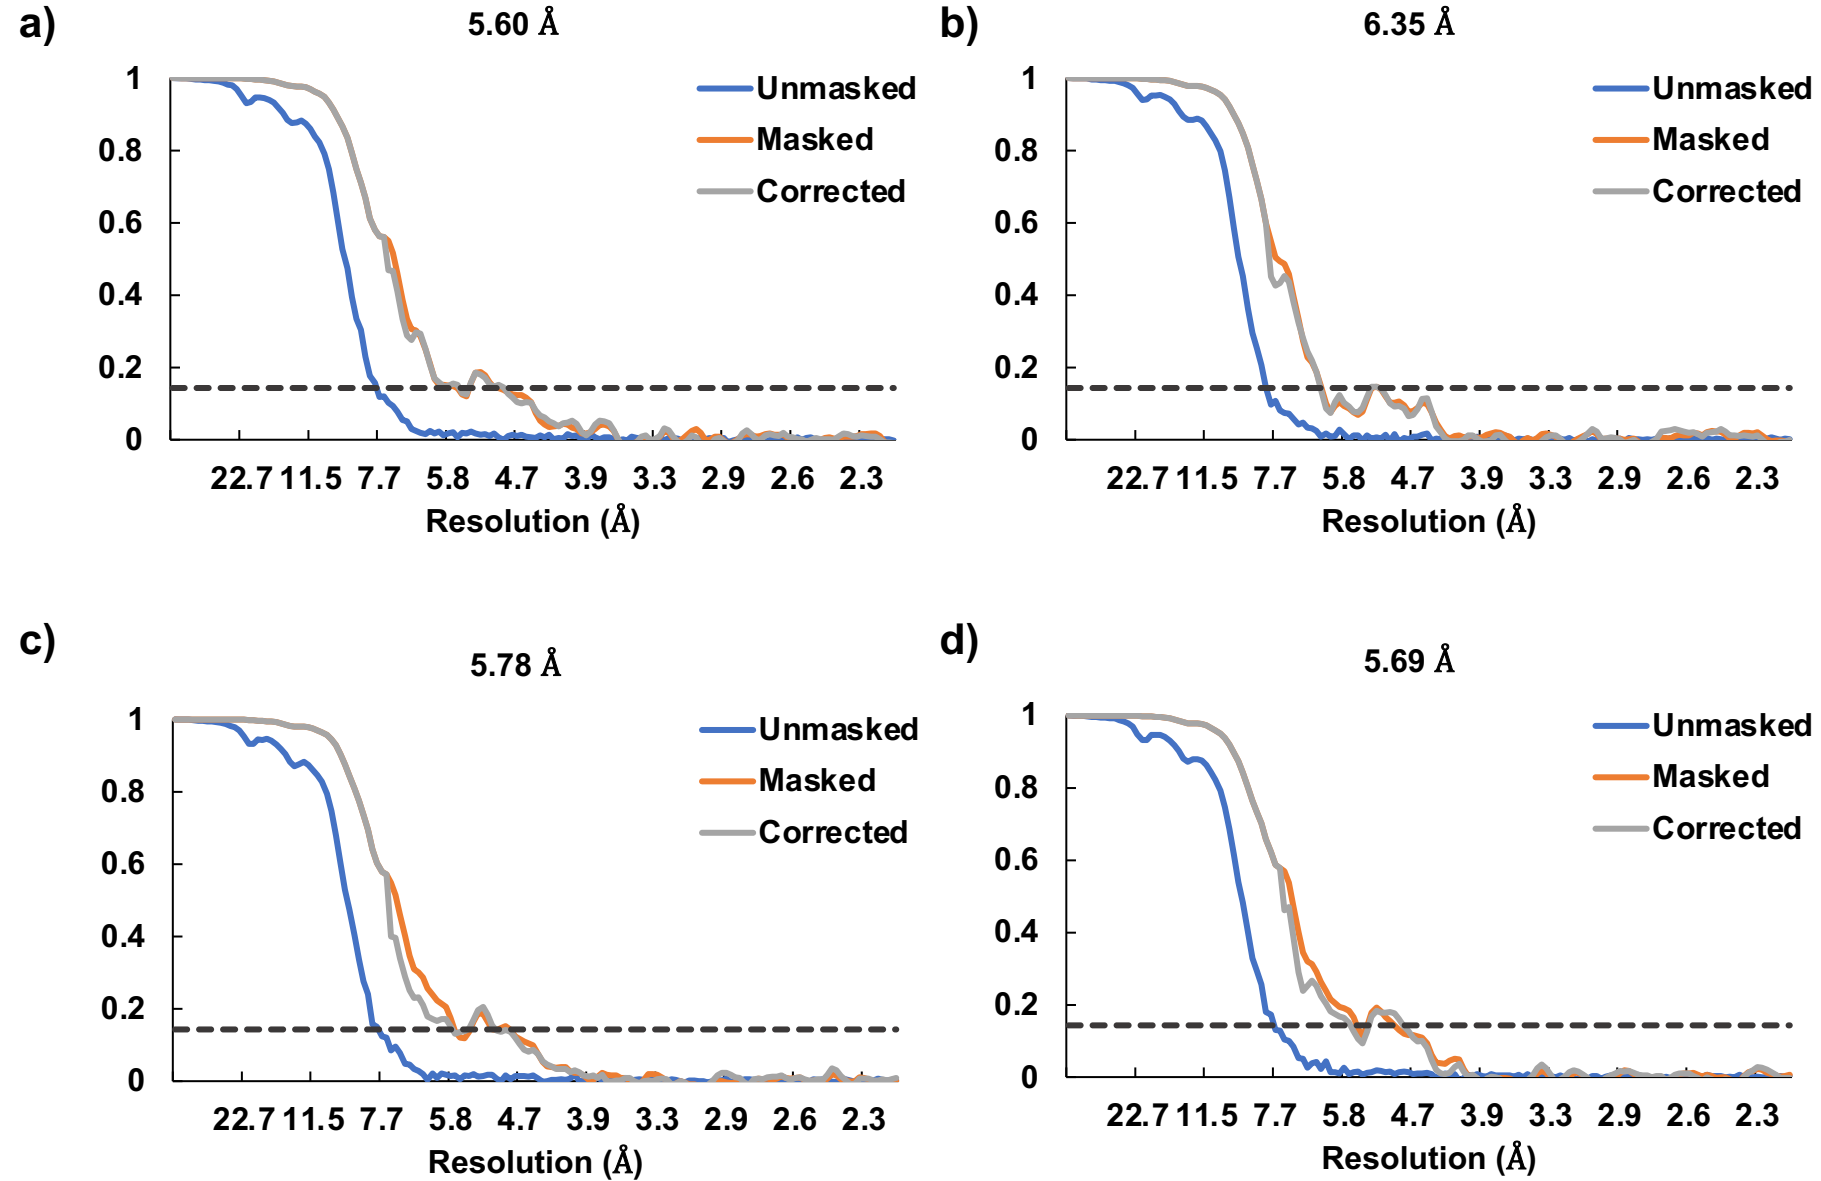

Fig.S3

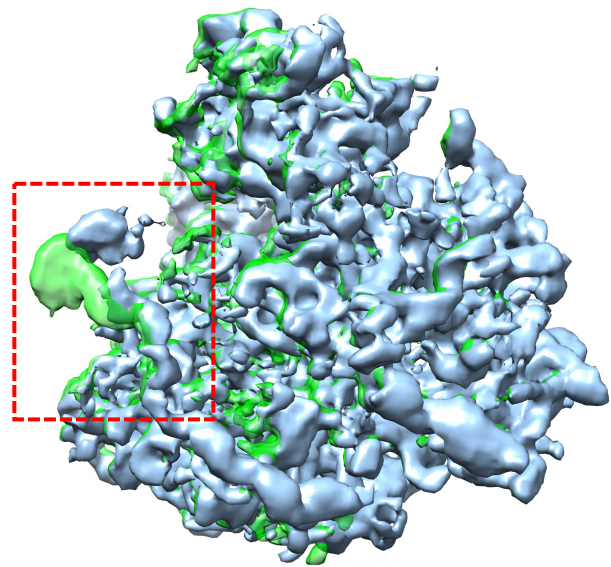

**Class 9 vs Class 8**

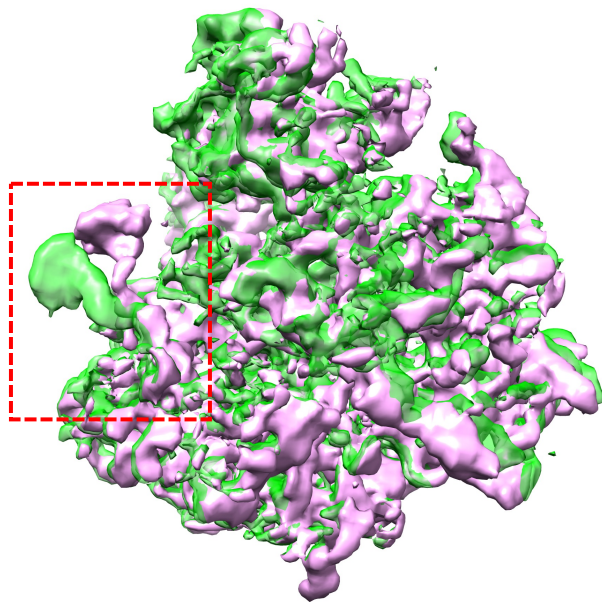

**Class 9 vs Class 4**

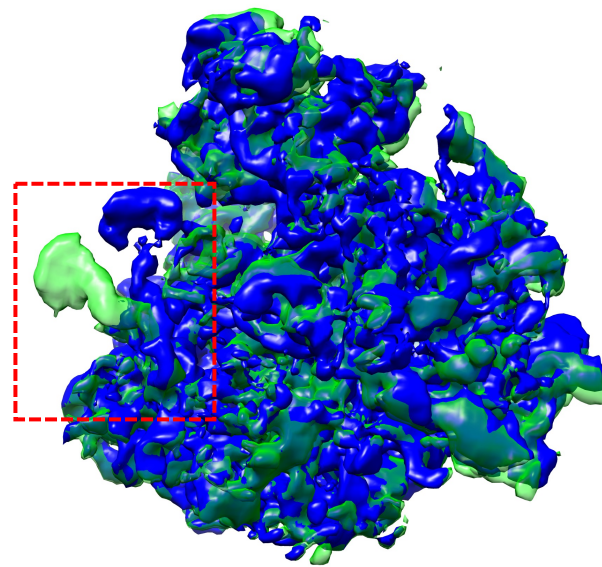

**Class 9 vs Class 6**

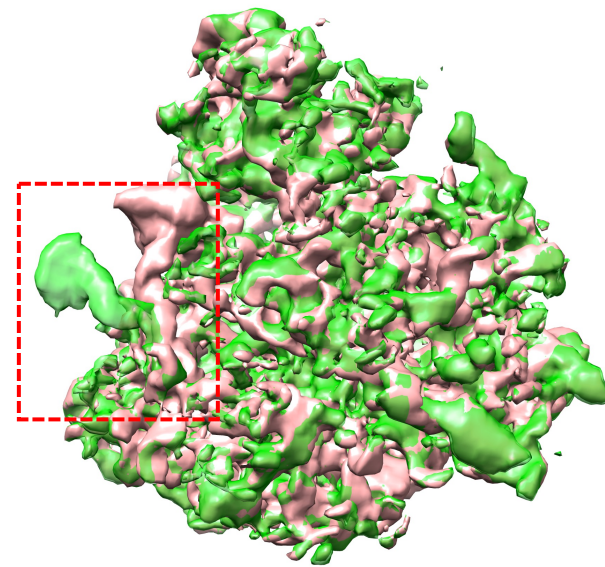

**Class 9 vs Class 5**



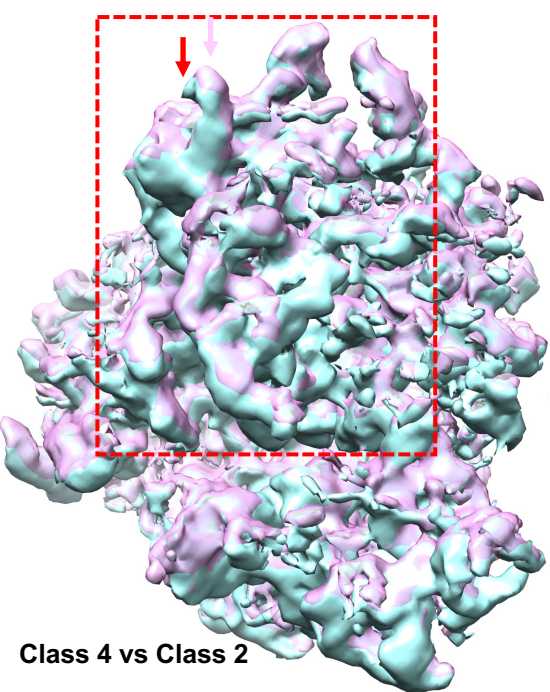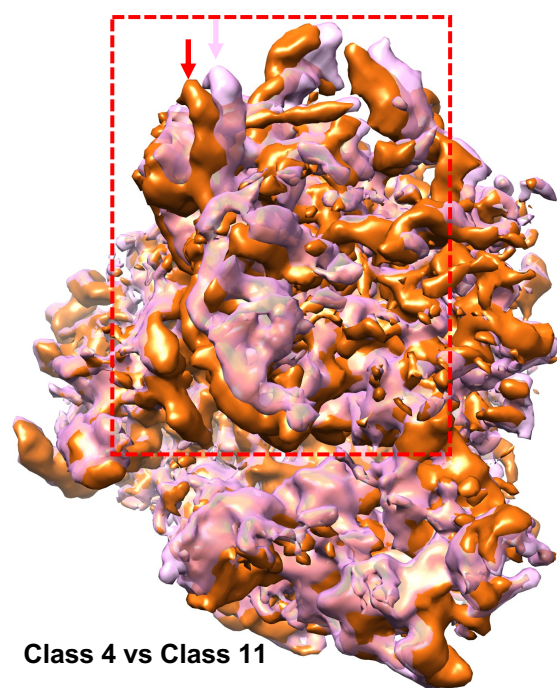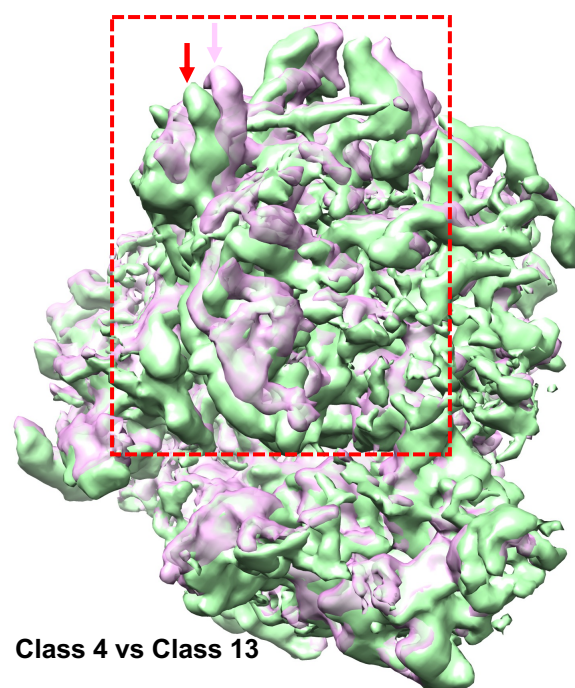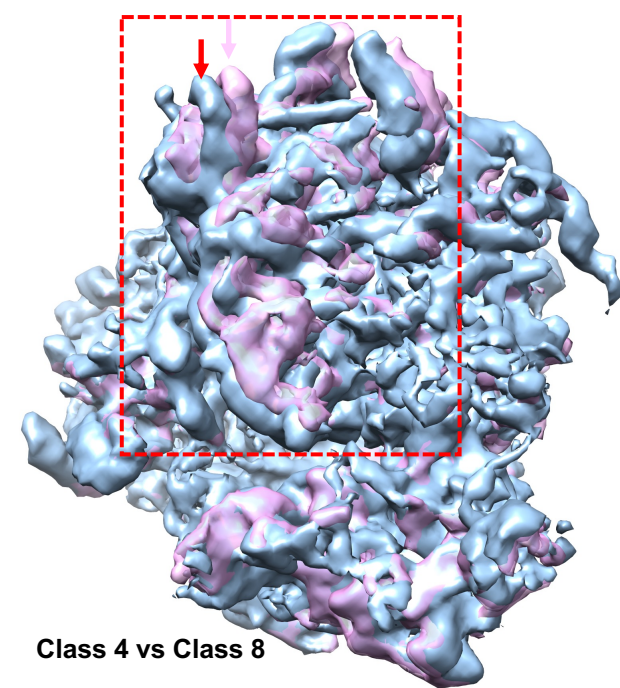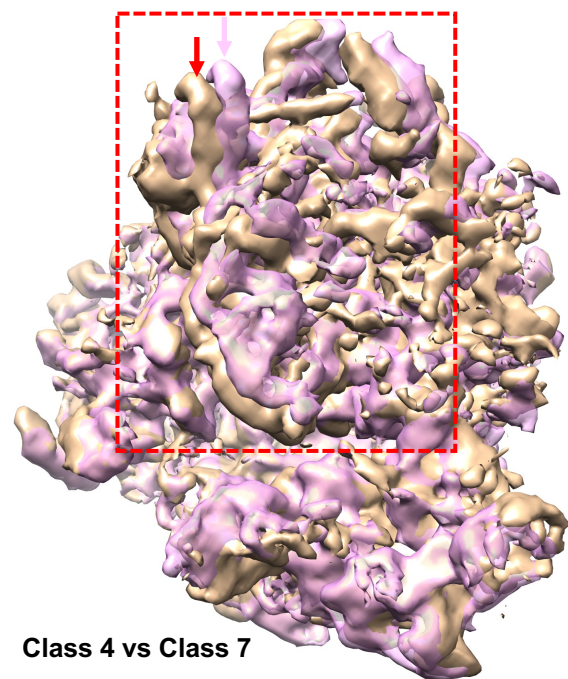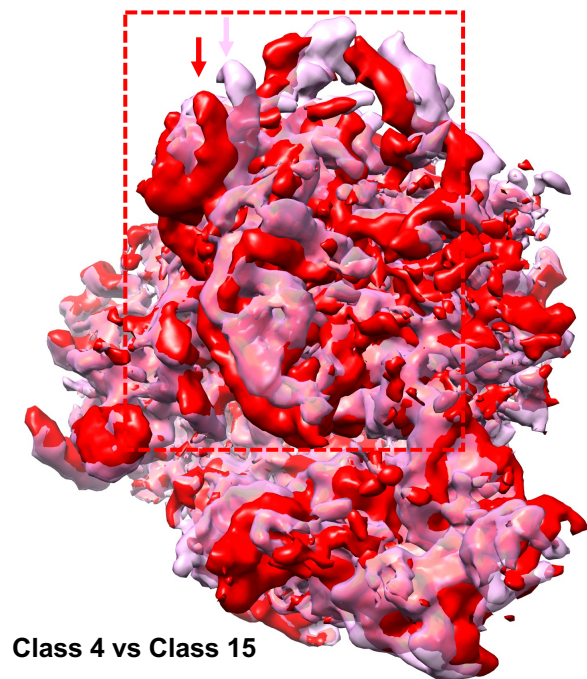

Supplement: Supplementary file [file media-1.pdf]
